# Supplementary material for: Immunological Significance of Prognostic DNA Methylation Sites in Hepatocellular Carcinoma
Source: Front Mol Biosci. 2021 May 26;8:683240. doi: 10.3389/fmolb.2021.683240 (PMC8187884; doi:10.3389/fmolb.2021.683240)
Supplement: Supplementary file 15 [file Table4.xlsx]

## Sheet: Sheet1
Supplementary Table 4. 136 significant CpG sites after multivariate Cox proportional regression
id	HR	HR.95L	HR.95H	pvalue
cg16022344	1.04504e+28	2.93842e+17	3.71662e+38	1.94151e-07
cg24341944	4.98695e+10	4.23296e+06	587523705361510	2.60235e-07
cg13935507	5.29967e+28	4.44102e+17	6.32434e+39	3.72352e-07
cg16338822	5.52903e+36	1.88874e+22	1.61855e+51	6.42413e-07
cg06466479	0.000450006	2.0222e-05	0.0100141	1.12539e-06
cg07289581	1.37554e+32	1.03579e+19	1.82674e+45	1.58733e-06
cg01522975	1.79965e+25	797923866468350	4.05896e+35	1.74385e-06
cg03718677	1.0863e-06	3.80976e-09	0.000309741	1.92313e-06
cg15128849	2.1586e+08	69400.8	6.71397e+11	2.91584e-06
cg17858663	1.5771e+31	1.31065e+18	1.89772e+44	2.94398e-06
cg11044823	1.36955e+12	1.0321e+07	1.81733e+17	3.4279e-06
cg21114485	2.06974e+28	2.11544e+16	2.02502e+40	3.68312e-06
cg27523951	861587610391164	3.61572e+08	2.05307e+21	4.42668e-06
cg17489451	61.3394	10.5546	356.48	4.55103e-06
cg20379012	9.50291e+08	135769	6.6514e+12	4.73186e-06
cg04025590	2.5472e+10	862694	752090644210830	5.05378e-06
cg24762437	4.42206e+25	413170370384812	4.73283e+36	5.18203e-06
cg08271519	9.23489e+11	6.07739e+06	1.40329e+17	6.01449e-06
cg13328485	74.5104	11.4256	485.909	6.60341e-06
cg01095395	137.845	16.0496	1183.92	7.12978e-06
cg17061853	1.0092e+21	5.69124e+11	1.78957e+30	8.54385e-06
cg16195804	4.10219e+21	1.12148e+12	1.5005e+31	9.44317e-06
cg20948472	474.261	30.8846	7282.71	9.81026e-06
cg08531821	9.83989e+11	4.56882e+06	2.11922e+17	1.04588e-05
cg17918089	4.55355e+11	2.94049e+06	7.05147e+16	1.06889e-05
cg05978187	1.27075e+41	3.85548e+22	4.18836e+59	1.35828e-05
cg00617305	131446	594.13	2.90813e+07	1.88138e-05
cg18294881	1.25511e+33	6.42888e+17	2.45034e+48	2.20909e-05
cg09747578	3197.54	74.5761	137098	2.56981e-05
cg26324201	1.00824e+07	5507.73	1.84568e+10	2.58428e-05
cg00887101	1.94696e+21	2.06502e+11	1.83565e+31	2.87266e-05
cg25558099	119.989	12.6495	1138.18	3.03689e-05
cg00893987	3.98252e+27	396569305311348	3.99942e+40	3.17427e-05
cg23704362	0.0399523	0.00865019	0.184526	3.71218e-05
cg15301525	1.86789e+65	1.27604e+34	2.73425e+96	4.04586e-05
cg23970338	3.75318e+10	332276	4239367461004310	4.10141e-05
cg25325612	4.17977e+46	1.67222e+24	1.04475e+69	4.51005e-05
cg09847234	8.12879e+10	461663	1.43129e+16	4.57502e-05
cg08636224	2.36999e-09	1.62425e-13	3.45813e-05	4.9125e-05
cg03532114	1.52908e+23	9.37222e+11	2.49469e+34	5.06416e-05
cg20466045	4.46652e+06	2627.54	7.59257e+09	5.46774e-05
cg05475028	1.62125e+12	1.8151e+06	1.44811e+18	5.78651e-05
cg09600437	7.90934e-08	2.58595e-11	0.000241914	6.5108e-05
cg13351698	1.63717e+12	1.54622e+06	1.73347e+18	7.08462e-05
cg01634119	1.37638e+23	5.00724e+11	3.78337e+34	7.35332e-05
cg06893980	2.4014e+23	5.79313e+11	9.95443e+34	7.99828e-05
cg01457080	6.69027e+06	2714.29	1.64904e+10	8.00926e-05
cg13501999	437.061	21.2861	8974.04	8.03677e-05
cg20347268	3.48284e+21	6.18991e+10	1.95966e+32	8.58397e-05
cg23512958	4.87929e-41	3.72177e-61	6.39679e-21	8.58783e-05
cg11964474	0.0934654	0.0285408	0.306081	9.00149e-05
cg27287808	3.09785e+07	5251.97	1.82725e+11	9.87175e-05
cg21351102	7.55427e+12	2.45862e+06	2.3211e+19	9.99637e-05
cg21262854	1.80618e+09	38529.8	8.46693e+13	0.000102671
cg20639263	4.35884e+10	184067	1.0322e+16	0.000104446
cg12351042	0.0379378	0.0072544	0.1984	0.000106081
cg21774863	339726465692360	1.51836e+07	7.60124e+21	0.000106613
cg18611281	1.1553e+07	2986.82	4.46866e+10	0.000114044
cg06834261	5.57796e-13	3.30011e-19	9.42805e-07	0.000115144
cg22068764	6.4921e+10	206641	2.03964e+16	0.000115704
cg19657082	3.16444e+13	4.33062e+06	2.3123e+20	0.000115705
cg03785807	1.24716e+16	7.78786e+07	1.99721e+24	0.000120486
cg18887228	87.4839	8.92348	857.673	0.000123461
cg16687447	1.07638e+74	1.54116e+36	7.5177e+111	0.000126
cg01273150	2.05778e+33	1.84462e+16	2.29557e+50	0.000128107
cg07403350	0.106376	0.0337722	0.335063	0.000129268
cg08807541	0.000119367	1.16851e-06	0.0121936	0.000129775
cg16280313	1.38506e+34	4.51527e+16	4.24868e+51	0.000129892
cg15654964	1.68421e+09	31409.8	9.03087e+13	0.00013148
cg18380974	2.3678e+08	11956.1	4.68921e+12	0.000133476
cg02301754	2.92768e-05	1.37043e-07	0.0062545	0.000136713
cg18677965	836.859	25.9862	26950.2	0.000145381
cg07561400	6.88808e+30	782244930514494	6.06531e+46	0.000150232
cg10906135	2.04753e+21	1.89855e+10	2.2082e+32	0.000153146
cg00510787	220.148	13.3806	3622.04	0.000159829
cg20346122	4.35181e+08	14245.6	1.32941e+13	0.000159915
cg05755837	2.16588e+08	9967.89	4.70616e+12	0.000165229
cg14013300	3.02502e+08	11321.4	8.08271e+12	0.00017347
cg17918239	3.78405e-06	5.58855e-09	0.00256221	0.000173858
cg19162106	12.9302	3.39831	49.1984	0.000173918
cg18418503	4.00949e+17	2.50837e+08	6.40895e+26	0.000177791
cg25552889	0.000351221	5.48378e-06	0.0224947	0.000178339
cg12269343	1.0195e+11	178064	5.83708e+16	0.000178773
cg22230395	100453	236.888	4.25978e+07	0.000190503
cg11884656	8.09558e+19	2.79733e+09	2.3429e+30	0.000191623
cg15486645	6.51949e+19	2.00181e+09	2.12326e+30	0.00022068
cg05352541	2.4501e+31	538565385832616	1.11463e+48	0.000221421
cg15541315	8.09352e+16	8.56622e+07	7.6469e+25	0.000222268
cg17718515	5.15203e+06	1408.99	1.88386e+10	0.000222404
cg15615135	1.2078e+17	9.69891e+07	1.50408e+26	0.000232281
cg12126786	1.64573e+12	482159	5.61727e+18	0.000247403
cg25929421	1.47799e+10	53674.6	4069785102352820	0.000248237
cg13982505	0.0425204	0.00781614	0.231314	0.000258188
cg01222684	74716.2	178.632	3.12515e+07	0.00026878
cg12032116	6.46599e+26	2.44831e+12	1.70767e+41	0.000268799
cg21091629	1760.52	31.5786	98149.9	0.000269624
cg09421020	192862790329661	3.78803e+06	9.81938e+21	0.000280196
cg25243721	1.04294e+22	1.36513e+10	7.96792e+33	0.000281634
cg15875120	2.16713e+06	810.767	5.79261e+09	0.000290508
cg08555924	211.042	11.6448	3824.77	0.000293823
cg15270851	2.62242e+18	2.75648e+08	2.49489e+28	0.00029708
cg07520158	2.15176e+42	2.40924e+19	1.9218e+65	0.000300186
cg18055007	0.190534	0.0775391	0.46819	0.000301089
cg02823866	6.14836e+33	2923561535469250	1.29302e+52	0.000301129
cg13759778	3230	40.2004	259522	0.000305601
cg08878304	2.85408e+20	2.20748e+09	3.69007e+31	0.000308413
cg04393897	6.44683e+25	6.15436e+11	6.7532e+39	0.000308512
cg02525396	9.75115e+11	295201	3.22103e+18	0.000312643
cg19479366	2.10446e+07	2154.17	2.05589e+11	0.000321423
cg27470406	1.1391e+33	1089397469083250	1.19107e+51	0.0003237
cg06476606	405082931134516	4.16557e+06	3.93925e+22	0.00033809
cg19664945	6.61434	2.35252	18.5969	0.000341055
cg16328820	1.75858e+13	977933	3.16238e+20	0.000345836
cg06839953	6.20158e+22	1.90371e+10	2.02024e+35	0.000356826
cg18370979	2940.32	36.5409	236598	0.000360659
cg17214107	0.129141	0.0417711	0.399254	0.000378949
cg05718625	2.95061e+19	5.33351e+08	1.63233e+30	0.000382105
cg04485075	6.02754e+17	9.30895e+07	3.90283e+27	0.000382476
cg05958659	83640.2	159.971	4.37309e+07	0.000386564
cg04270788	4.82534e+07	2702.81	8.61472e+11	0.000397151
cg10186308	6.49713e+17	8.79168e+07	4.80143e+27	0.000403633
cg20466180	0.00111402	2.56822e-05	0.0483235	0.000407536
cg04273556	182.972	10.1492	3298.67	0.000414714
cg01360768	3.59048e+19	5.00173e+08	2.57741e+30	0.00041475
cg05191792	70002.2	140.999	3.47542e+07	0.000427527
cg11223252	1.47935e+08	4119.54	5.3124e+12	0.00043923
cg14817143	2.56952e+17	5.04244e+07	1.30938e+27	0.000439441
cg13834500	6.46848e+06	1021.64	4.09549e+10	0.000445609
cg12477119	1.36804e+09	10663.5	175508798464750	0.000455872
cg01366407	3.63859e+07	2148.8	6.16128e+11	0.00045765
cg23408913	1.04413e+27	7.73167e+11	1.41004e+42	0.000465361
cg07472159	126.787	8.40968	1911.47	0.00046835
cg27149093	142503	182.928	1.11012e+08	0.00047692
cg20172280	84.5747	6.9922	1022.98	0.000484769
cg19208897	288.314	11.9586	6951.06	0.000486401
cg09305478	906.075	19.6973	41679.4	0.000490781
