# Supplementary material for: Immunological Significance of Prognostic DNA Methylation Sites in Hepatocellular Carcinoma
Source: Front Mol Biosci. 2021 May 26;8:683240. doi: 10.3389/fmolb.2021.683240 (PMC8187884; doi:10.3389/fmolb.2021.683240)
Supplement: Supplementary file 22 [file Table7.xlsx]

## Sheet: Sheet1
Supplementary Table 7. Clinical data after 2nd random grouping.
Covariates	Type	Total	Test	Train	Pvalue
age	<=65	227(62.19%)	108(59.34%)	119(65.03%)	0.3114
age	>65	138(37.81%)	74(40.66%)	64(34.97%)
gender	FEMALE	119(32.6%)	63(34.62%)	56(30.6%)	0.48
gender	MALE	246(67.4%)	119(65.38%)	127(69.4%)
grade	G1-2	230(63.01%)	112(61.54%)	118(64.48%)	0.683
grade	G3-4	130(35.62%)	67(36.81%)	63(34.43%)
grade	unknow	5(1.37%)	3(1.65%)	2(1.09%)
stage	Stage I-II	254(69.59%)	125(68.68%)	129(70.49%)	0.5155
stage	Stage III-IV	87(23.84%)	47(25.82%)	40(21.86%)
stage	unknow	24(6.58%)	10(5.49%)	14(7.65%)
T	T1-2	271(74.25%)	130(71.43%)	141(77.05%)	0.396
T	T3-4	91(24.93%)	49(26.92%)	42(22.95%)
T	unknow	3(0.82%)	3(1.65%)	0(0%)
M	M0	263(72.05%)	134(73.63%)	129(70.49%)	0.2673
M	M1	3(0.82%)	3(1.65%)	0(0%)
M	unknow	99(27.12%)	45(24.73%)	54(29.51%)
N	N0	248(67.95%)	131(71.98%)	117(63.93%)	0.7063
N	N1	4(1.1%)	3(1.65%)	1(0.55%)
N	unknow	113(30.96%)	48(26.37%)	65(35.52%)
